# Supplementary material for: Type 2 innate immunity promotes the development of pulmonary fibrosis in Hermansky-Pudlak syndrome
Source: JCI journal article supplement (doi:10.1172/jci.insight.178381), 2024-10-15
Supplement: sd1 [file 1]

You are being redirected.
